# Supplementary material
Source: HighWire-hosted journal article supplement (http://www.cmaj.ca/highwire/filestream/58272/field_highwire_adjunct_files/4/cardiac-park-app_5.pdf)
Supplement: cardiac-park-app_5.pdf [file cardiac-park-app_5.pdf]

## Appendix 5 (as supplied by the authors): Risk of bias assessment of included studies\*

Reporting bias was assessed using the Cochrane risk of bias tool.(15) Half the trials described the sequence generation in the randomization process (14,20–23,26); the remainder of the studies were unclear in their description. Similarly, allocation concealment was unclear across seven of the studies.(14,21–23,26) The majority of the studies were double blinded, with the exception of CARE-HF(26), COMPANION(24), Lozano et al(19), and MUSTIC SR(20). The three former studies, although not blinded, did have endpoint evaluation performed by a blinded committee, while MUSTIC SR was single blinded. The blinding methodology was unspecified in Lozano et al (19). Eight trials randomized patients after the device was implanted (19–23,25,27,28), introducing a systematic bias prior to the randomization process as patients who did not have a successful implant were systematically excluded from the study. The majority of the studies were funded by industry, with the exception of RAFT(14) and MUSTIC(20), which received funding from peer-reviewed agencies.

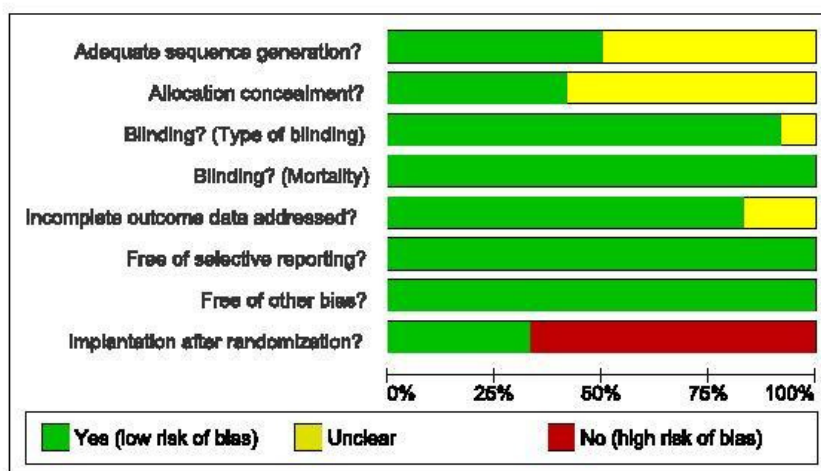

|                | Adequate sequence generation? | Allocation concealment? | Blinding? (Type of blinding) | Blinding? (Mortality) | Incomplete outcome data addressed? | Free of selective reporting? | Free of other bias? | Implementation after randomization? |
|----------------|-------------------------------|-------------------------|------------------------------|-----------------------|------------------------------------|------------------------------|---------------------|-------------------------------------|
| CARE-HF        | +                             | +                       | +                            | +                     | +                                  | +                            | +                   | +                                   |
| COMPANION      | •/–                           | •/–                     | +                            | +                     | +                                  | +                            | +                   | +                                   |
| Unde REVERSE   | •/–                           | •/–                     | +                            | +                     | +                                  | +                            | +                   | –                                   |
| Lozano         | •/–                           | •/–                     | •/–                          | +                     | +                                  | +                            | +                   | –                                   |
| MADIT-CRT      | •/–                           | •/–                     | +                            | +                     | +                                  | +                            | +                   | +                                   |
| MIRACLE        | +                             | +                       | +                            | +                     | +                                  | +                            | +                   | –                                   |
| MIRACLE ICD    | +                             | +                       | +                            | +                     | +                                  | +                            | +                   | –                                   |
| MIRACLE ICD II | +                             | +                       | +                            | +                     | +                                  | +                            | +                   | –                                   |
| MUSTIC         | +                             | •/–                     | +                            | +                     | +                                  | +                            | +                   | –                                   |
| RAFT           | +                             | +                       | +                            | +                     | +                                  | +                            | +                   | +                                   |
| RHYTHM ICD     | •/–                           | •/–                     | +                            | +                     | •/–                                | +                            | +                   | –                                   |
| VECTOR         | •/–                           | •/–                     | +                            | +                     | •/–                                | +                            | +                   | –                                   |

## References\*

14. Tang AS, Wells GA, Talajic M, et al.; Resynchronization-Defibrillation for Ambulatory Heart Failure Trial (RAFT) Investigators. Cardiac-resynchronization therapy for mild-to-moderate heart failure. *N Engl J Med* 2010;363:2385-95.
15. Altman DG, Antes G, Gotzsche P, et al. Assessing risk of bias in included studies. In: Higgins JPT, Altman DG, editors. *Cochrane handbook for systematic reviews of interventions*. Version 5.0.0 (updated February 2008). London (UK): The Cochrane Collaboration; 2008. Available: [www.cochrane-handbook.org](http://www.cochrane-handbook.org) (accessed 2011 Jan. 12).
19. Lozano I, Bocchiardo M, Achtelik M, et al. Impact of biventricular pacing on mortality in a randomized crossover study of patients with heart failure and ventricular arrhythmias. *Pacing Clin Electrophysiol* 2000;23:1711-2.
20. Cazeau S, Leclercq C, Lavergne T, et al; Multisite Stimulation in Cardiomyopathies (MUSTIC) Study Investigators. Effects of multisite biventricular pacing in patients with heart failure and intraventricular conduction delay. *N Engl J Med* 2001;344:873-80.
21. Abraham WT, Fisher WG, Smith AL, et al.; Multicenter Insync Randomized Clinical Evaluation (MIRACLE) Study Group. Cardiac resynchronization in chronic heart failure. *N Engl J Med* 2002;346:1845-53.
22. Young JB, Abraham WT, Smith AL, et al. Combined cardiac resynchronization and implantable cardioversion defibrillation in advanced chronic heart failure: the MIRACLE ICD Trial. *JAMA* 2003;289:2685-94.
23. Abraham WT, Young JB, Leon AR, et al. Effects of cardiac re-synchronization on disease progression in patients with left ventricular systolic dysfunction, an indication for an implantable cardioverter-defibrillator, and mildly symptomatic chronic heart failure. *Circulation* 2004;110:2864-8.
24. Bristow MR, Saxon LA, Boehmer J, et al. Cardiac-resynchronization therapy with or without an implantable defibrillator in advanced chronic heart failure. *N Engl J Med* 2004;350:2140-50.
25. St. Jude Medical® Epic™ HF System including the Epic™ HF model V-338 cardiac resynchronization therapy defibrillator, the Aescula™ LV model 1055K lead, the QuickSite™ LV model 1056K lead, and the model 3307, v4.5m programmer software: summary of safety and effectiveness. Silver Springs (MD): US Food and Drug Administration; 2004. Available: [www.accessdata.fda.gov/scripts/cdrh/cfdocs/cfTopic/pma/pma.cfm?num=p030054](http://www.accessdata.fda.gov/scripts/cdrh/cfdocs/cfTopic/pma/pma.cfm?num=p030054) (accessed 2011 Jan. 12).
26. Cleland JG, Daubert JC, Erdmann E, et al. The effect of cardiac resynchronization on morbidity and mortality in heart failure. *N Engl J Med* 2005;352:1539-49.
27. St. Jude Medical Frontier™ model 5508L and Frontier™ II model 5586 cardiac resynchronization therapy pacemakers (CRT-P) supported on the model 3510 programmer platforms with the model 3307, v4.8m programmer software: summary of safety and effectiveness. Silver Spring (MD): US Food and Drug Administration; 2005. Available: [www.accessdata.fda.gov/scripts/cdrh/cfdocs/cfTopic/pma/pma.cfm?num=p030035s003](http://www.accessdata.fda.gov/scripts/cdrh/cfdocs/cfTopic/pma/pma.cfm?num=p030035s003) (accessed 2011 Jan. 12).
28. Linde C, Abraham WT, Gold MR, et al. Randomized trial of cardiac resynchronization in mildly symptomatic heart failure patients and in asymptomatic patients with left ventricular dysfunction and previous heart failure symptoms. *J Am Coll Cardiol* 2008;52:1834-43.

\*Reference numbers correspond to those in the main article.
